# Supplementary material for: Structural Characterization and Bioactivity of a Titanium(IV)-Oxo Complex Stabilized by Mandelate Ligands
Source: MDPI journal article supplement (doi:10.3390/molecules29081736), 2024-04-11
Supplement: s1 [file s1]

# Supplementary Information

## Structural Characterization and Bioactivity of a Titanium(IV)-Oxo Complex Stabilized by Mandelate Ligands

Barbara Kubiak <sup>1,\*</sup>, Tadeusz Muzioł <sup>1</sup>, Grzegorz Wrzeszcz <sup>1</sup>, Aleksandra Radtke <sup>1</sup>, Patrycja Golińska <sup>2</sup>, Tomasz Jędrzejewski <sup>3</sup>, Sylwia Wrotek <sup>3</sup> and Piotr Piszczek <sup>1,\*</sup>

<sup>1</sup> Department of Inorganic and Coordination Chemistry, Faculty of Chemistry, Nicolaus Copernicus University in Toruń, Gagarina 7, 87-100 Toruń, Poland; tadeuszmuziol@wp.pl (T.M.); wrzeszcz@umk.pl (G.W.); aleksandra.radtke@umk.pl (A.R.)

<sup>2</sup> Department of Microbiology, Faculty of Biological and Veterinary Sciences, Nicolaus Copernicus University in Toruń, Lwowska 1, 87-100 Toruń, Poland; golinska@umk.pl

<sup>3</sup> Department of Immunology, Faculty of Biological and Veterinary Sciences, Nicolaus Copernicus University in Toruń, Lwowska 1, 87-100 Toruń, Poland; tomaszj@umk.pl (T.J.); wrotek@umk.pl (S.W.)

\* Correspondence: basiak0809@gmail.com (B.K.); piszczek@umk.pl (P.P.)

**Table S1.** Selected bond lengths [Å] and bond angles [°] in (1).

|                      | Distance<br>[Å] |                          | Angles [°] |                          | Angles [°] |
|----------------------|-----------------|--------------------------|------------|--------------------------|------------|
| Ti1-O21              | 1.798(3)        | O21-Ti1-O10              | 106.35(13) | O3-Ti2-O31 <sup>i</sup>  | 88.97(12)  |
| Ti1-O10              | 1.867(3)        | O21-Ti1-O31              | 95.00(13)  | O10-Ti2-O31 <sup>i</sup> | 75.77(11)  |
| Ti1-O31              | 1.952(3)        | O10-Ti1-O31              | 104.11(12) | O12-Ti2-O31 <sup>i</sup> | 82.35(12)  |
| Ti1-O1               | 2.055(3)        | O21-Ti1-O1               | 93.57(13)  | O81-Ti3-O71              | 93.59(19)  |
| Ti1-O3               | 2.058(3)        | O10-Ti1-O1               | 147.75(13) | O81-Ti3-O61              | 108.5(2)   |
| Ti1-O10 <sup>i</sup> | 2.074(3)        | O31-Ti1-O1               | 98.98(12)  | O71-Ti3-O61              | 99.92(18)  |
| Ti1-Ti1 <sup>i</sup> | 3.0086(13)      | O21-Ti1-O3               | 92.88(13)  | O81-Ti3-O13              | 171.30(16) |
| Ti1-Ti2              | 3.1036(10)      | O10-Ti1-O3               | 78.25(11)  | O71-Ti3-O13              | 94.42(16)  |
| Ti1-Ti2 <sup>i</sup> | 3.1940(10)      | O31-Ti1-O3               | 170.73(13) | O61-Ti3-O13              | 73.42(15)  |
| Ti2-O41              | 1.769(3)        | O1-Ti1-O3                | 75.62(11)  | O81-Ti3-O11              | 100.03(18) |
| Ti2-O51              | 1.807(3)        | O21-Ti1-O10 <sup>i</sup> | 171.33(13) | O71-Ti3-O11              | 93.70(16)  |
| Ti2-O3               | 2.006(3)        | O10-Ti1-O10 <sup>i</sup> | 80.61(12)  | O61-Ti3-O11              | 147.34(15) |
| Ti2-O10              | 2.040(3)        | O31-Ti1-O10 <sup>i</sup> | 78.06(12)  | O13-Ti3-O11              | 76.06(13)  |
| Ti2-O12              | 2.054(3)        | O1-Ti1-O10 <sup>i</sup>  | 82.53(11)  | O81-Ti3-O2 <sup>i</sup>  | 82.89(16)  |
| Ti2-O31 <sup>i</sup> | 2.091(3)        | O3-Ti1-O10 <sup>i</sup>  | 93.64(11)  | O71-Ti3-O2 <sup>i</sup>  | 173.50(17) |
| Ti3-O81              | 1.784(4)        | O41-Ti2-O51              | 97.93(16)  | O61-Ti3-O2 <sup>i</sup>  | 86.41(14)  |
| Ti3-O71              | 1.795(4)        | O41-Ti2-O3               | 95.43(15)  | O13-Ti3-O2 <sup>i</sup>  | 88.81(13)  |
| Ti3-O61              | 1.933(4)        | O51-Ti2-O3               | 95.79(13)  | O11-Ti3-O2 <sup>i</sup>  | 81.59(12)  |
| Ti3-O13              | 2.038(4)        | O41-Ti2-O10              | 98.47(14)  | O101-Ti4-O111            | 101.9(3)   |
| Ti3-O11              | 2.070(3)        | O51-Ti2-O10              | 162.13(14) | O101-Ti4-O91             | 111.3(3)   |
| Ti3-O2 <sup>i</sup>  | 2.172(3)        | O3-Ti2-O10               | 75.65(11)  | O111-Ti4-O91             | 100.0(3)   |
| Ti3-Ti4              | 3.2486(15)      | O41-Ti2-O12              | 91.80(15)  | O101-Ti4-O13             | 118.1(3)   |
| Ti4-O101             | 1.773(5)        | O51-Ti2-O12              | 96.26(14)  | O111-Ti4-O13             | 91.02(19)  |
| Ti4-O111             | 1.787(5)        | O3-Ti2-O12               | 164.96(12) | O91-Ti4-O13              | 125.55(19) |
| Ti4-O91              | 1.801(5)        | O10-Ti2-O12              | 90.27(12)  | O101-Ti4-O61             | 90.6(3)    |
| Ti4-O13              | 1.979(3)        | O41-Ti2-O31 <sup>i</sup> | 171.70(14) | O111-Ti4-O61             | 161.70(19) |
| Ti4-O61              | 2.098(4)        | O51-Ti2-O31 <sup>i</sup> | 88.60(14)  | O91-Ti4-O61              | 87.5(2)    |
|                      |                 |                          |            | O13-Ti4-O61              | 71.20(14)  |

**Table S2.** Coordination modes in (1).

| Coordination sphere content – number of atoms involved in Ti(IV) binding |                     |                   |                 |                         |          |           |
|--------------------------------------------------------------------------|---------------------|-------------------|-----------------|-------------------------|----------|-----------|
| Central atom                                                             | Coordination number | mandelate         |                 | iPrO <sup>-</sup> anion |          | Oxo anion |
|                                                                          |                     | RCOO <sup>-</sup> | RO <sup>-</sup> | terminal                | bridging |           |
| Ti1                                                                      | 6                   | 1                 | <b>1</b>        | 1                       | 1        | 2         |
| Ti2                                                                      | 6                   | 1                 | 1               | 2                       | 1        | 1         |
| Ti3                                                                      | 6                   | 2                 | <b>1</b>        | 2                       | 1        | -         |
| Ti4                                                                      | 5                   | -                 | 1               | 3                       | 1        | -         |

In bold are marked hydroxyl groups involved in five-membered chelate ring with one oxygen atom from carboxylic group

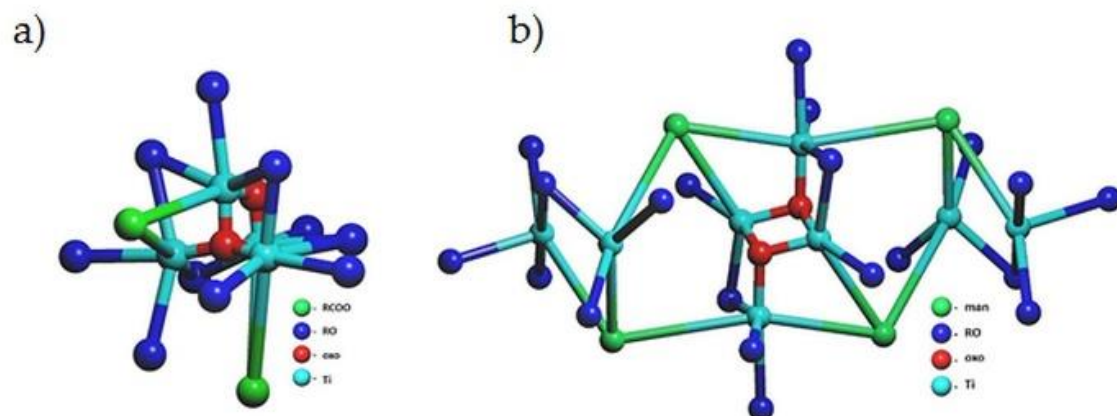

**Figure S1.** The topological analysis of the cluster with  $\{\text{Ti}_4\text{O}_2\}$  core ([7] left) (a), and  $\{\text{Ti}_8\text{O}_2\}$  (**1**) (this paper, right) cores performed in TOPOS with titanium cations in cyan, oxo anions in red, mandelate (carboxylate) anions in green and propionate anions in blue.

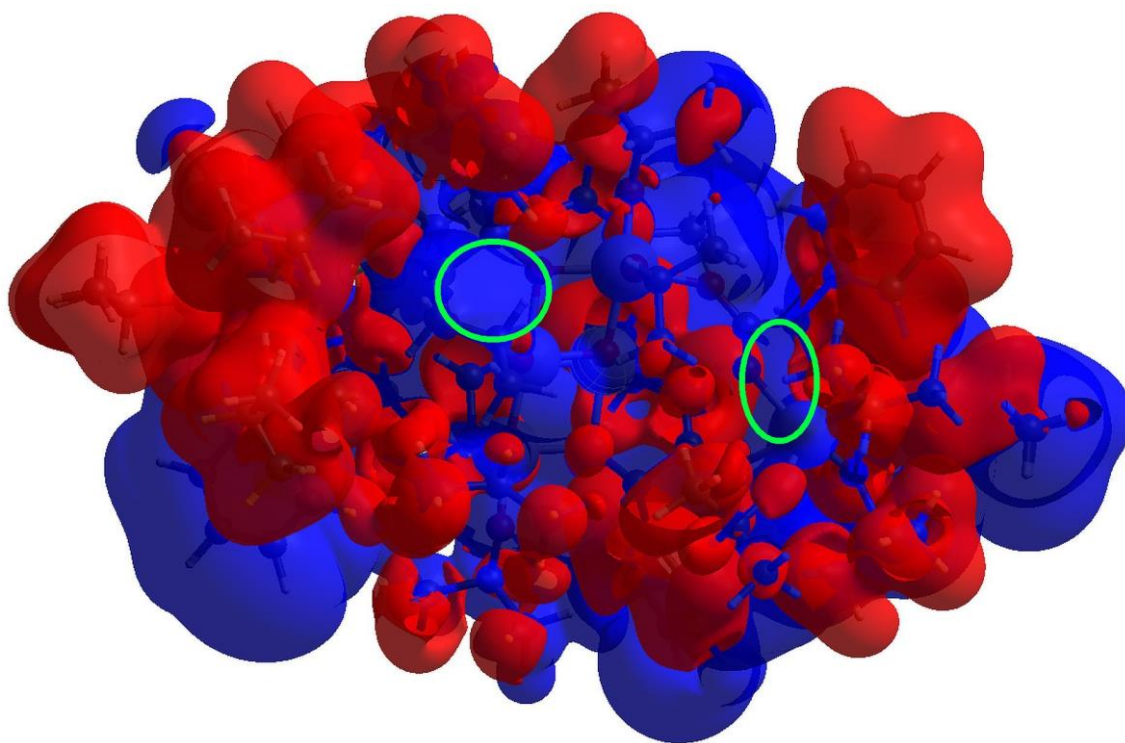

**Figure S2.** 3D-deformation density map for (1) showing the presence of charge depletion regions (in red) and charge concentration regions (in blue), mapped using Crystal Explorer 21.5. The isosurfaces are drawn at 0.008 eau<sup>-3</sup>. The green circles show two of four chelate rings present in this molecule. In all of them the same feature occurs – the blue color prevails pointing at charge concentration in this region. The wavefunction was calculated at the level B3LYP/6-31G(d,p) [80-83].

#### Reference:

- [80] Becke, A.D. Density-functional thermochemistry. III. The role of exact exchange. *J. Chem. Phys.* 1993, 98, 5648–5652.
- [81] Stephens, P.J.; Devlin, F.J.; Chabalowski, C.F.; Frisch, M.J. Ab Initio Calculation of Vibrational Absorption and Circular Dichroism Spectra Using Density Functional Force Fields. *J. Phys. Chem.* 1994, 98, 11623–11627.
- [82] Becke, A.D. Density-functional exchange-energy approximation with correct asymptotic behavior. *Phys. Rev. A* 1988, 38, 3098–3100.
- [83] Lee, C.; Yang, W.; Parr, R.G. Development of the Colle-Salvetti correlation-energy formula into a functional of the electron density. *Phys. Rev. B* 1988, 37, 785–789.

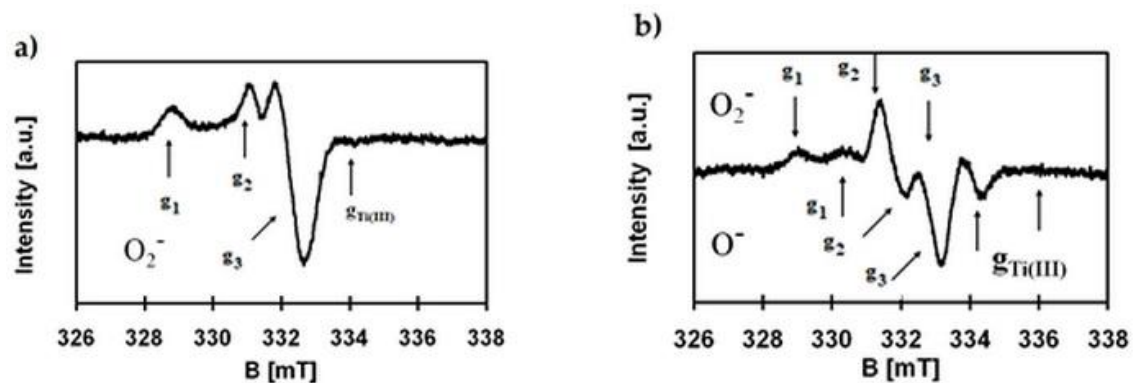

**Figure S3.** EPR spectra of powdered TOCs (a) and PMMA + (1) wt.20% composite (b) of TOCs. Some experimental conditions: room temperature, microwave frequency: 9.31648 GHz (a) 9.32357 GHz (b); modulation amplitude: 1 mT; sweep: 20 mT; sweep time: 4 min.; time constant: 0.1 s; receiver gain:  $4 \times 10^5$ .
